# Supplementary material for: Epidemiology of lower extremity peripheral artery disease in veterans
Source: PubMed Central journal article supplement — J Vasc Surg. Author manuscript; Available in PMC 2018 Sep 11. (PMC6132057; doi:10.1016/j.jvs.2017.11.083), 2018-03-24
Supplement: NIHMS1501641-supplement-1.pdf [file NIHMS1501641-supplement-1.pdf]

**Supplementary Table I (online only).** International Classification of Diseases, Ninth Revision (ICD-9) codes

| ICD-9                                                          | Corresponding diagnosis                                                                                      |
|----------------------------------------------------------------|--------------------------------------------------------------------------------------------------------------|
| <b>PAD diagnosis</b>                                           |                                                                                                              |
| Other peripheral vascular disease                              |                                                                                                              |
| 443.89                                                         | Other specified peripheral vascular disease                                                                  |
| 443.9                                                          | Peripheral vascular disease, unspecified                                                                     |
| <b>Atherosclerosis</b>                                         |                                                                                                              |
| 440.20                                                         | Atherosclerosis of the native arteries and extremities                                                       |
| 440.21                                                         | Atherosclerosis of the native arteries and extremities with intermittent claudication                        |
| 440.4                                                          | Chronic total occlusion of the artery of the extremities                                                     |
| 440.9                                                          | Generalized and unspecified atherosclerosis                                                                  |
| <b>Diabetes with peripheral circulatory disorders</b>          |                                                                                                              |
| 249.7                                                          | Secondary diabetes mellitus with peripheral circulatory disorders, not stated as uncontrolled or unspecified |
| 249.71                                                         | Secondary diabetes mellitus with peripheral circulatory disorders, uncontrolled                              |
| 250.70                                                         | Diabetes with peripheral circulatory disorders, type II or unspecified type, not stated as controlled        |
| 250.71                                                         | Diabetes with peripheral circulatory disorders, type I [juvenile type], not stated as uncontrolled           |
| 250.72                                                         | Diabetes with peripheral circulatory disorders, type II or unspecified type, uncontrolled                    |
| 250.73                                                         | Diabetes with peripheral circulatory disorders, type I [juvenile type], uncontrolled                         |
| <b>CLI diagnosis</b>                                           |                                                                                                              |
| <b>Pain in limb</b>                                            | <b>Use of 729.5 requires one or more of the codes 440.2-400.24 italicized below</b>                          |
| 729.5                                                          | Pain in Limb                                                                                                 |
| 440.20                                                         | <i>Atherosclerosis of the native arteries and extremities</i>                                                |
| 440.21                                                         | <i>Atherosclerosis of the native arteries and extremities with intermittent claudication</i>                 |
| 440.22                                                         | <i>Other atherosclerosis of the native arteries and extremities with rest pain</i>                           |
| 440.23                                                         | <i>Atherosclerosis of native arteries of the extremities with ulceration</i>                                 |
| 440.24                                                         | <i>Atherosclerosis of native arteries of the extremities with gangrene</i>                                   |
| <b>Ulcer of lower limb</b>                                     | <b>Use of 707 codes below requires one or more of the italicized codes 404.2-440.24</b>                      |
| 707.1                                                          | Ulcer of lower limbs, except decubitus ulcer                                                                 |
| 707.10                                                         | Ulcer of lower limb, unspecified                                                                             |
| 707.13                                                         | Ulcer of ankle                                                                                               |
| 707.14                                                         | Ulcer of heel and midfoot                                                                                    |
| 707.15                                                         | Ulcer of other part of foot                                                                                  |
| 707.19                                                         | Ulcer of other part of lower limb                                                                            |
| 707.9                                                          | Chronic ulcer of unspecified site                                                                            |
| 440.20                                                         | <i>Atherosclerosis of the native arteries and extremities</i>                                                |
| 440.21                                                         | <i>Atherosclerosis of the native arteries and extremities with intermittent claudication</i>                 |
| 440.22                                                         | <i>Other atherosclerosis of the native arteries and extremities with rest pain</i>                           |
| 440.23                                                         | <i>Atherosclerosis of native arteries of the extremities with ulceration</i>                                 |
| 440.24                                                         | <i>Atherosclerosis of native arteries of the extremities with gangrene</i>                                   |
| <b>Atherosclerosis with rest pain, gangrene, or ulceration</b> |                                                                                                              |
| 440.22                                                         | Atherosclerosis of native arteries of the extremities with rest pain                                         |
| 440.23                                                         | Atherosclerosis of native arteries of the extremities with ulceration                                        |
| 440.24                                                         | Atherosclerosis of native arteries of the extremities with gangrene                                          |

(Continued on next page)

**Supplementary Table I (online only).** Continued.

| ICD-9                             | Corresponding diagnosis                                                                                  |
|-----------------------------------|----------------------------------------------------------------------------------------------------------|
| <b>Excision/débridement</b>       | <b>Use of excision/débridement codes below requires one or more of the italicized codes 404.2-440.24</b> |
| 77.65                             | Local excision of lesion or tissue of bone, femur                                                        |
| 77.66                             | Local excision of lesion or tissue of bone, patella                                                      |
| 77.67                             | Local excision of lesion or tissue of bone, tibia and fibula                                             |
| 77.68                             | Local excision of lesion or tissue of bone, tarsals and metatarsals                                      |
| 86.22                             | Excisional débridement of wound, infection, or burn                                                      |
| 99.10                             | Injection or infusion of thrombolytic agent                                                              |
| 440.20                            | <i>Atherosclerosis of the native arteries and extremities</i>                                            |
| 440.21                            | <i>Atherosclerosis of the native arteries and extremities with intermittent claudication</i>             |
| 440.22                            | <i>Other atherosclerosis of the native arteries and extremities with rest pain</i>                       |
| 440.23                            | <i>Atherosclerosis of native arteries of the extremities with ulceration</i>                             |
| 440.24                            | <i>Atherosclerosis of native arteries of the extremities with gangrene</i>                               |
| Lower extremity revascularization |                                                                                                          |
| Peripheral bypass                 |                                                                                                          |
| 39.25                             | Aorta-iliac-femoral bypass                                                                               |
| 39.29                             | Other (peripheral) vascular shunt or bypass                                                              |
| Endarterectomy                    |                                                                                                          |
| 38.18                             | Endarterectomy, lower limb arteries                                                                      |
| 38.38                             | Resection of vessel with anastomosis, lower limb arteries                                                |
| 38.68                             | Other excision of vessels, lower limb arteries                                                           |
| Lower extremity amputation        |                                                                                                          |
| <b>Amputation</b>                 | <b>Use of amputation codes below requires one or more of the italicized codes 404.2-440.24</b>           |
| 84.10                             | Lower limb amputation, not otherwise specified                                                           |
| 84.12                             | Amputation through foot                                                                                  |
| 84.14                             | Amputation of ankle through malleoli of tibia and fibula                                                 |
| 84.15                             | Other amputation below knee                                                                              |
| 84.17                             | Amputation above knee                                                                                    |
| 84.3                              | Revision of amputation stump                                                                             |
| 84.91                             | Amputation, not otherwise specified                                                                      |
| 84.11                             | Amputation of toe                                                                                        |
| 440.20                            | <i>Atherosclerosis of the native arteries and extremities</i>                                            |
| 440.21                            | <i>Atherosclerosis of the native arteries and extremities with intermittent claudication</i>             |
| 440.22                            | <i>Other atherosclerosis of the native arteries and extremities with rest pain</i>                       |
| 440.23                            | <i>Atherosclerosis of native arteries of the extremities with ulceration</i>                             |
| 440.24                            | <i>Atherosclerosis of native arteries of the extremities with gangrene</i>                               |
| <b>Disarticulation</b>            | <b>Use of disarticulation codes below requires one or more of the italicized codes 404.2-440.24</b>      |
| 84.13                             | Disarticulation of ankle                                                                                 |
| 84.16                             | Disarticulation of knee                                                                                  |
| 84.18                             | Disarticulation of hip                                                                                   |
| 440.20                            | <i>Atherosclerosis of the native arteries and extremities</i>                                            |
| 440.21                            | <i>Atherosclerosis of the native arteries and extremities with intermittent claudication</i>             |
| 440.22                            | <i>Other atherosclerosis of the native arteries and extremities with rest pain</i>                       |
| 440.23                            | <i>Atherosclerosis of native arteries of the extremities with ulceration</i>                             |
| 440.24                            | <i>Atherosclerosis of native arteries of the extremities with gangrene</i>                               |

CLI, Critical limb ischemia; PAD, peripheral artery disease.

**Supplementary Table II (online only).** Current Procedural Terminology (CPT) codes

| Category              | CPT code | Description                                                                            |
|-----------------------|----------|----------------------------------------------------------------------------------------|
| Major amputation      |          |                                                                                        |
| Above knee amputation |          |                                                                                        |
|                       | 27590    | Above knee amputation: thigh, through femur, any level                                 |
|                       | 27591    | Above knee amputation: thigh, through femur with immediate prosthetic                  |
|                       | 27592    | Above knee amputation: thigh, through femur, any level guillotine                      |
| Below knee amputation |          |                                                                                        |
|                       | 27880    | Below knee amputation: leg, through tibia and fibula                                   |
|                       | 27881    | Below knee amputation: leg, through tibia and fibula with immediate prosthetic         |
|                       | 27882    | Below knee amputation: leg, through tibia and fibula, guillotine                       |
| Open procedures       |          |                                                                                        |
| Inflow                |          |                                                                                        |
|                       | 35521    | Bypass graft, with vein; axillary-femoral                                              |
|                       | 35351    | Thromboendarterectomy, including patch graft, if performed; iliac                      |
|                       | 35355    | Thromboendarterectomy, including patch graft, if performed; iliofemoral                |
|                       | 35361    | Thromboendarterectomy, including patch graft, if performed; combined aortoiliac        |
|                       | 35363    | Thromboendarterectomy, including patch graft, if performed; combined aortoiliofemoral  |
|                       | 35537    | Aortoiliac bypass                                                                      |
|                       | 35538    | Bypass graft, with vein; aortobi-iliac                                                 |
|                       | 35539    | Bypass graft, with vein; aortofemoral                                                  |
|                       | 35540    | Bypass graft, with vein; aortobifemoral                                                |
|                       | 35541    | Bypass graft, with vein                                                                |
|                       | 35546    | Aortofemoral bypass with vein                                                          |
|                       | 35539    | Aortofemoral graft with vein. For aortofemoral graft with vein                         |
|                       | 35548    | Bypass graft, with vein; aortoiliofemoral, unilateral                                  |
|                       | 35549    | Bypass graft, with vein; aortoiliofemoral, bilateral                                   |
|                       | 35551    | Bypass graft, with vein; aortofemoral-popliteal                                        |
|                       | 35563    | Bypass graft, with vein; ilioiliac                                                     |
|                       | 35565    | Bypass graft, with vein; iliofemoral                                                   |
|                       | 35621    | Bypass graft, with other than vein; axillary-femoral                                   |
|                       | 35623    | Bypass graft, with other than vein; axillary-popliteal or -tibial                      |
|                       | 35637    | Bypass graft, with other than vein; aortoiliac                                         |
|                       | 35638    | Bypass graft, with other than vein; aortobi-iliac                                      |
|                       | 35646    | Bypass graft, with other than vein; aortobifemoral                                     |
|                       | 35647    | Bypass graft, with other than vein; aortofemoral                                       |
|                       | 35651    | Bypass graft, with other than vein; aortofemoral-popliteal                             |
|                       | 35654    | Bypass graft, with other than vein; axillary-femoral-femoral                           |
|                       | 35661    | Bypass graft, with other than vein; femoral-femoral                                    |
|                       | 35663    | Bypass graft, with other than vein; ilioiliac                                          |
|                       | 35665    | Bypass graft, with other than vein; iliofemoral                                        |
| Outflow procedure     |          |                                                                                        |
|                       | 35302    | Thromboendarterectomy, including patch graft, if performed; superficial femoral artery |
|                       | 35303    | Thromboendarterectomy, including patch graft, if performed; popliteal artery           |
|                       | 35304    | Thromboendarterectomy, including patch graft, if performed; tibioperoneal trunk artery |
|                       | 35305    | Thromboendarterectomy, including patch graft, if performed; tibial or peroneal artery  |

(Continued on next page)

**Supplementary Table II (online only).** Continued.

| Category               | CPT code | Description                                                                                                                           |
|------------------------|----------|---------------------------------------------------------------------------------------------------------------------------------------|
|                        | 35306    | Thromboendarterectomy, including patch graft, if performed; each additional tibial                                                    |
|                        | 35371    | Thromboendarterectomy, including patch graft, if performed; common femoral                                                            |
|                        | 35372    | Thromboendarterectomy, including patch graft, if performed; deep (profunda) femoral                                                   |
|                        | 35533    | Bypass graft, with vein; axillary-femoral-femoral                                                                                     |
|                        | 35556    | Bypass graft, with vein; femoral-popliteal                                                                                            |
|                        | 35558    | Bypass graft, with vein; femoral-femoral                                                                                              |
|                        | 35566    | Bypass graft, with vein; femoral-anterior tibial, posterior tibial, peroneal artery                                                   |
|                        | 35571    | Bypass graft, with vein; popliteal-tibial, -peroneal artery or other distal vessels                                                   |
|                        | 35583    | In-situ vein bypass; femoral-popliteal                                                                                                |
|                        | 35585    | In-situ vein bypass; femoral-anterior tibial, posterior tibial, or peroneal artery                                                    |
|                        | 35587    | In-situ vein bypass; popliteal-tibial, peroneal                                                                                       |
|                        | 35656    | Bypass graft, with other than vein; femoral-popliteal                                                                                 |
|                        | 35666    | Bypass graft, with other than vein; femoral-anterior tibial, posterior tibial, or peroneal artery                                     |
|                        | 35671    | Bypass graft, with other than vein; popliteal-tibial or -peroneal artery                                                              |
|                        | 35681    | Bypass graft; composite, prosthetic and vein                                                                                          |
|                        | 35682    | Bypass graft; autogenous composite, two segments of veins from two locations                                                          |
|                        | 35683    | Bypass graft; autogenous composite, three or more segments of vein                                                                    |
| Endovascular procedure |          |                                                                                                                                       |
| Inflow                 |          |                                                                                                                                       |
|                        | 35452    | Transluminal balloon angioplasty, open; aortic                                                                                        |
|                        | 35454    | Transluminal balloon angioplasty, open; iliac                                                                                         |
|                        | 35472    | Transluminal balloon angioplasty, percutaneous; aortic                                                                                |
|                        | 35473    | Transluminal balloon angioplasty, percutaneous; iliac                                                                                 |
|                        | 35481    | Transluminal peripheral atherectomy, open; aortic                                                                                     |
|                        | 35482    | Transluminal peripheral atherectomy, open; iliac                                                                                      |
|                        | 35491    | Transluminal peripheral atherectomy, percutaneous; aortic                                                                             |
|                        | 35492    | Transluminal peripheral atherectomy, percutaneous; iliac                                                                              |
| Outflow procedure      |          |                                                                                                                                       |
|                        | 35456    | Transluminal balloon angioplasty, open; femoral-popliteal                                                                             |
|                        | 35459    | Transluminal balloon angioplasty, open; tibioperoneal trunk and branches                                                              |
|                        | 35470    | Transluminal balloon angioplasty, percutaneous; tibioperoneal trunk or branches, each vessel                                          |
|                        | 35474    | Transluminal balloon angioplasty, percutaneous; femoral-popliteal                                                                     |
|                        | 35483    | Transluminal peripheral atherectomy, open; femoral-popliteal                                                                          |
|                        | 35485    | Transluminal peripheral atherectomy, open; tibioperoneal trunk and branches                                                           |
|                        | 35493    | Transluminal peripheral atherectomy, percutaneous; femoral-popliteal                                                                  |
|                        | 35495    | Transluminal peripheral atherectomy, percutaneous; tibioperoneal trunk and branches                                                   |
|                        | 37205    | Transcatheter placement of an intravascular stent(s), (except coronary, carotid, and vertebral vessel), percutaneous; initial vessels |
|                        | 37206    | Transcatheter placement of an intravascular stent(s), (except coronary, carotid, and vertebral vessel), percutaneous                  |
|                        | 37207    | Transcatheter placement of an intravascular stent(s), (noncoronary vessel), open; initial vessel                                      |
|                        | 37208    | Transcatheter placement of an intravascular stent(s), (noncoronary vessel), open; each additional vessel each additional vessel       |

**Supplementary Table III (online only).** Number of events of primary and secondary outcomes stratified by data source

| 1-Year follow-up        | Combined data<br>(VA and Medicare), No. (%) | VA only,<br>No. (%) | Medicare<br>only, No. (%) | Additional Medicare cases<br>not identified using VA data, No.<br>(% of combined) |
|-------------------------|---------------------------------------------|---------------------|---------------------------|-----------------------------------------------------------------------------------|
| Mortality               | 9182 (8.9)                                  | 8853 (8.6)          | 9176 (8.9)                | 329 (3.6)                                                                         |
| Revascularization       | 1870 (1.8)                                  | 1667 (1.6)          | 205 (0.2)                 | 203 (10.9)                                                                        |
| Amputation              | 849 (0.8)                                   | 823 (0.8)           | 26 (0.03)                 | 26 (3.1)                                                                          |
| Hospitalization for CLI | 1444 (1.4)                                  | 1078 (1.1)          | 203 (0.2)                 | 186 (14.7)                                                                        |

CLI, Critical limb ischemia; VA, Veterans Affairs.

Number of events of primary and secondary outcomes stratified by data source (VA, Medicare, combined VA and Medicare) within the subgroup of patients aged 66 years or older who were Medicare eligible and had available Medicare claims (n = 102,708 patients).
